# Supplementary material for: ER network homeostasis is critical for plant endosome streaming and endocytosis
Source: PubMed Central journal article supplement (PMC4860783; doi:10.1038/celldisc.2015.33), 2015-11-17
Supplement: celldisc201533-s1.pdf [file celldisc201533-s1.pdf]

**A**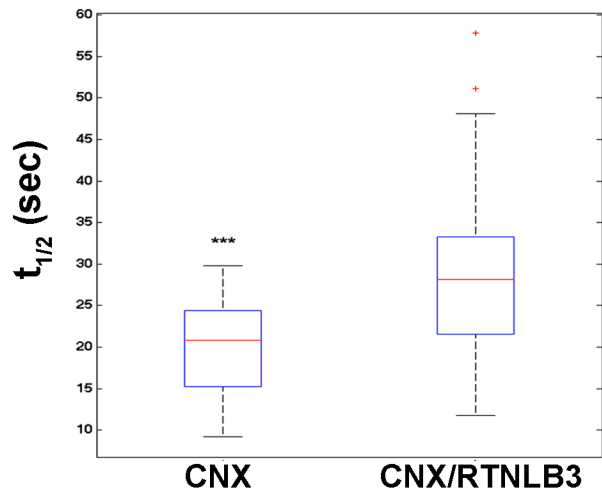**B**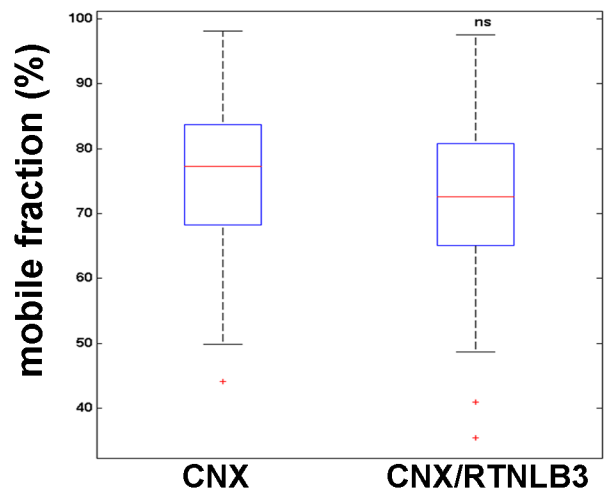**Figure S1**
