# Supplementary material for: ER network homeostasis is critical for plant endosome streaming and endocytosis
Source: PubMed Central journal article supplement (PMC4860783; doi:10.1038/celldisc.2015.33), 2015-11-17
Supplement: celldisc201533-s6.pdf [file celldisc201533-s6.pdf]

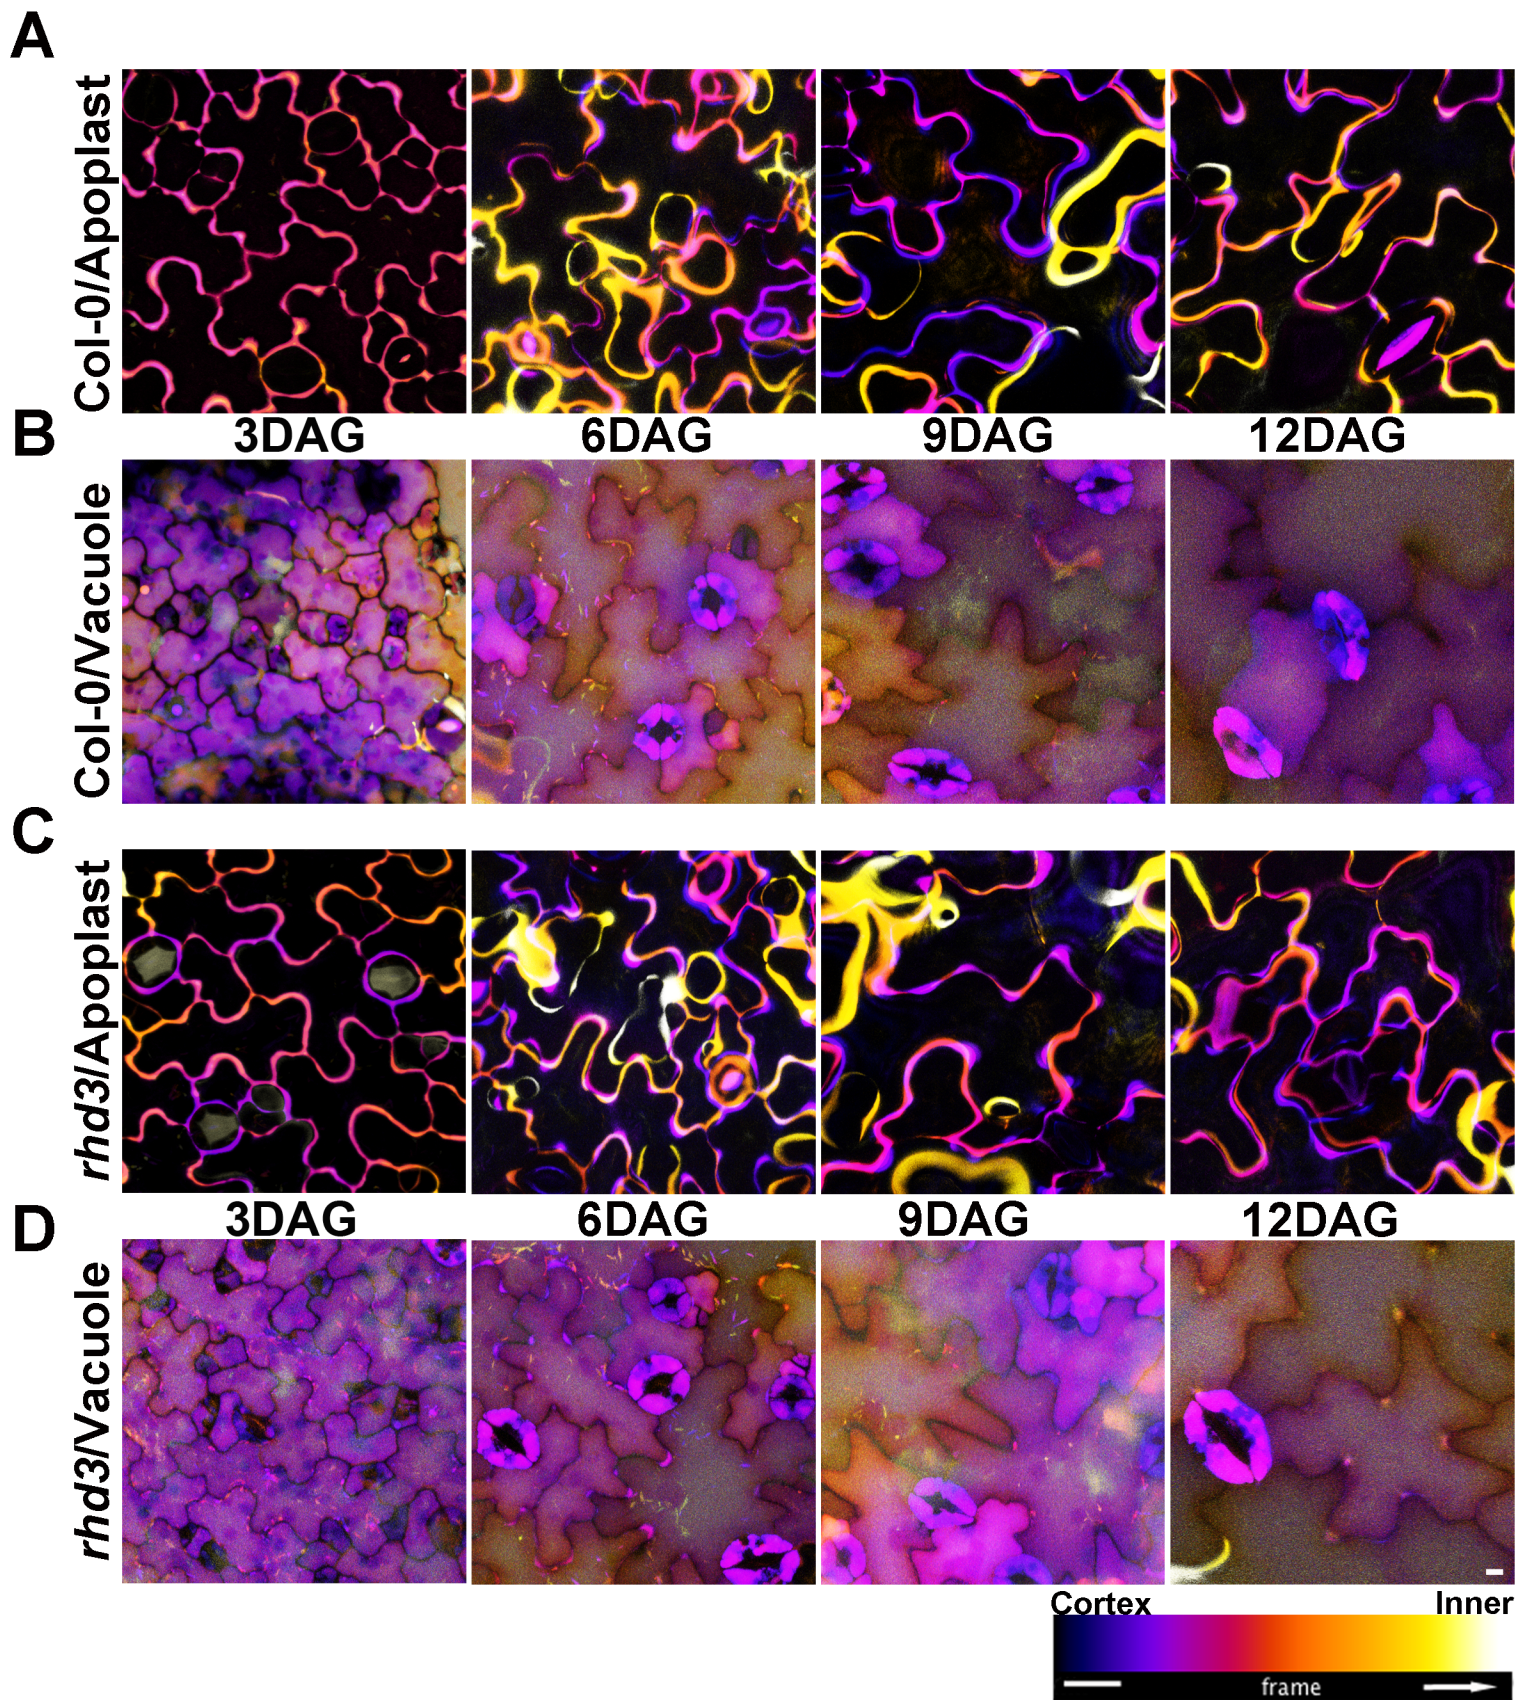

Figure S6
